# Supplementary material
Source: Springer Nature journal article supplement (https://publikationen.ub.uni-frankfurt.de/opus4/files/1518/12896_2006_189_MOESM6_ESM.pdf)

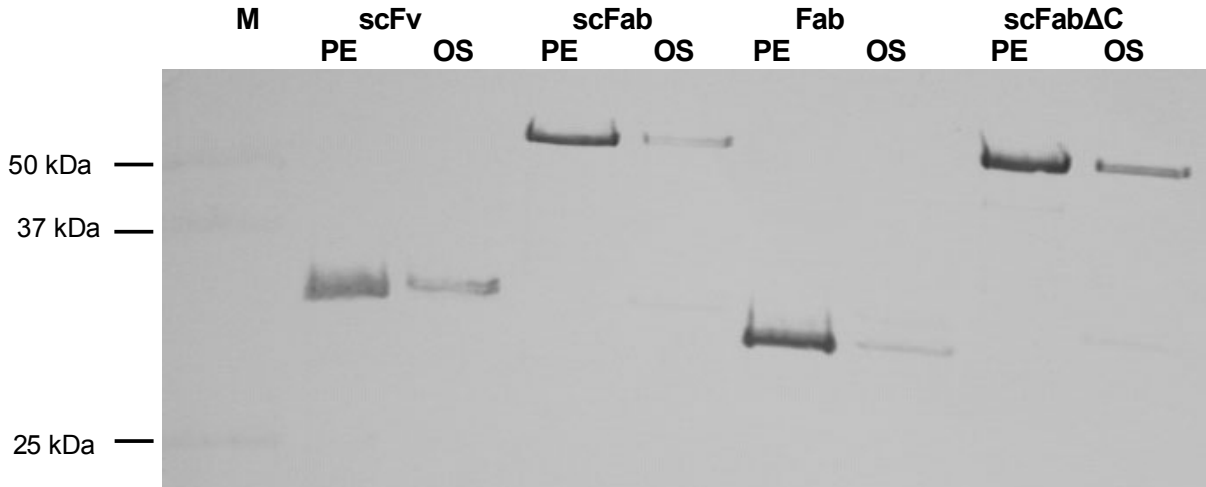

Supplement: MOESM6 [file 12896_2006_189_MOESM6_ESM.pdf]
